# Supplementary material for: A phase 1 trial utilizing TMI with fludarabine-melphalan in patients with hematologic malignancies undergoing second allo-SCT
Source: PubMed Central journal article supplement — Blood Adv. 2022 Jul 20;7(3):285–92. doi: 10.1182/bloodadvances.2022007530 (PMC9898602; doi:10.1182/bloodadvances.2022007530), 2022-07-20
Supplement: BLOODA_ADV-2022-007530-mmc1.pdf [file BLOODA_ADV-2022-007530-mmc1.pdf]

| Total IM-TMI Dose | Timing of IM-TMI conditioning regimen                                                      |
|-------------------|--------------------------------------------------------------------------------------------|
|                   | (Flu 30mg/m <sup>2</sup> daily from day -7 to -3; mel 140mg/m <sup>2</sup> on day -2) plus |
| 6Gy               | 1.5Gy twice daily on day -7 and -6                                                         |
| 9Gy               | 1.5Gy twice daily on day -7, -6, and -5                                                    |
| 12Gy              | 1.5Gy twice daily on day -7, -6, -5, and -4                                                |

**Supplemental Table 1. Timing of IM-TMI conditioning regimen for each dose level.**

|                                                      | Day 30              | Day 100              | Day 180          | Day 365             |
|------------------------------------------------------|---------------------|----------------------|------------------|---------------------|
| <b>Median absolute number (range) of donor cells</b> |                     |                      |                  |                     |
| CD19+ (/uL)                                          | 5.2 (0.6-29.3)      | 36.2 (2.5-267.5)     | 33.2 (0-354.9)   | 224.5 (9.6-570.5)   |
| CD3+ (/uL)                                           | 399.6 (17.8-1090.6) | 747.6 (275.4-3670.3) | 787 (130-2954.2) | 1058.5 (355.1-1926) |
| IgG (mg/dL)                                          | 471 (283-1498)      | 379 (220-1051)       | 405 (112-1206)   | 510 (347-1497)      |
| <b>Chimerism % (range)</b>                           |                     |                      |                  |                     |
| Unfractionated donor chimerism                       | 100 (75-100)        | 100 (96-100)         | 100 (96-100)     | 100                 |
| CD3+ donor chimerism                                 | 100 (86-100)        | 100 (96-100)         | 100              | 100                 |

**Supplemental Table 2. Immune reconstitution after transplantation.** Chimerism in the bone marrow, along with monitoring for B cell, T cell, and immunoglobulin reconstitution, was analyzed at days 30, 100, 180, and 365 post-transplantation. Two patients who had graft failure were excluded.

|                                                | Median PFS, in days (range) | Median OS, in days (range) |
|------------------------------------------------|-----------------------------|----------------------------|
| <b>All Patients (n=21)</b>                     | 350 (38-859)                | 608 (38-919)               |
| <b>Patients with persistent disease (n=11)</b> | 296 (38-818)                | 573 (38-919)               |
| <b>Patients in remission (n=10)</b>            | Not reached (65-859)        | Not reached (76-859)       |

**Supplemental Table 3. Progression-Free Survival and Overall Survival.** Median PFS and OS among patients in remission compared to patients with persistent disease.

| Study                                    | Number of Patients | Disease and Number of Patients                                                 | Donor for 2 <sup>nd</sup> SCT                             | Median Age (years) | Conditioning Regimen                             | Median Time to Follow-up | 2-year OS | 2-year PFS | 2-year Cumulative Incidence of Relapse (95% CI) | 2-year NRM (95% CI)        |
|------------------------------------------|--------------------|--------------------------------------------------------------------------------|-----------------------------------------------------------|--------------------|--------------------------------------------------|--------------------------|-----------|------------|-------------------------------------------------|----------------------------|
| Current Study                            | 21                 | AML (n=18)<br>MDS/MPN (n=2)<br>ALL (n=1)                                       | MRD (n=7)<br>MUD (n=13)<br>7/8 MUD (n=1)                  | 56 (22-72)         | Flu/mel + TMI<br>RIC (n=5, 24%)<br>MAC (16, 76%) | 11 months                | 50%       | 48%        | 35% (13-58%)                                    | 17% (95% CI, 4-39%)        |
| Choi et al, Clin Transplant, 2021        | 80                 | AML (n=62)<br>ALL (n=18)                                                       | MRD (n=4)<br>MUD (n=30)<br>Familial haploidentical (n=46) | 38 (17-70)         | MAC (n=13, 16.2%)<br>RIC (n=67, 83.8%)           | 45 months                | 21%       | 17.7%      | 60.2%                                           | 18.7%                      |
| Fan et al, Exp Hematol Onc, 2019         | 65                 | AML (n=47)<br>MDS (n=5)<br>Lymphoma (n=6)<br>CML (n=2)<br>Other leukemia (n=5) | MRD (n=33)<br>MUD (n=21)<br>Haplo-cord (n=11)             | 45 (11-73)         | MAC (n=44, 67.7%)<br>RIC (n=21, 32.3%)           | 23 months                | 22.6%     | 17.5%      | 36.9% (at 1 year)                               | 33.8% (at 1 year)          |
| Shimoni et al, Blood Cancer J, 2019      | 556                | AML (n=556)                                                                    | Same donor (n=163)                                        | 46 (20-73)         | MAC (45%)<br>RIC (55%)                           | 52 months                | 36.4%     | 23.5%      | 32%                                             | 25.1% (95% CI, 18.6-32%)   |
|                                          |                    |                                                                                | Different matched donor (n=305)                           | 48 (20-69)         | MAC (39%)<br>RIC (61%)                           | 30.5 months              | 28.7%     | 23.7%      | 44%                                             | 26.9% (95% CI, 21.8-32.3%) |
|                                          |                    |                                                                                | Haplo-identical (n=88)                                    | 45 (20-71)         | MAC (40%)<br>RIC (60%)                           | 33 months                | 23.3%     | 21.8%      | 13%                                             | 33.9% (95% CI, 23.7-44.4%) |
| Yalniz et al, Transplant Cell Ther, 2021 | 91                 | AML (n=91)                                                                     | MRD (n=37)<br>MUD (n=34)                                  | 44 (18-73)         | RIC (n=71, 78%)                                  | 66 months                | 36%       | 27%        | 42% (95% CI 32-54%)                             | 18% (95% CI, 18-37%)       |

|  |  |  |                          |  |  |  |  |  |  |  |
|--|--|--|--------------------------|--|--|--|--|--|--|--|
|  |  |  | Haploidentical<br>(n=19) |  |  |  |  |  |  |  |
|  |  |  | Cord blood (n=1)         |  |  |  |  |  |  |  |

**Supplemental Table 4. Comparison of Outcomes after 2<sup>nd</sup> HCT in Recent Literature.**

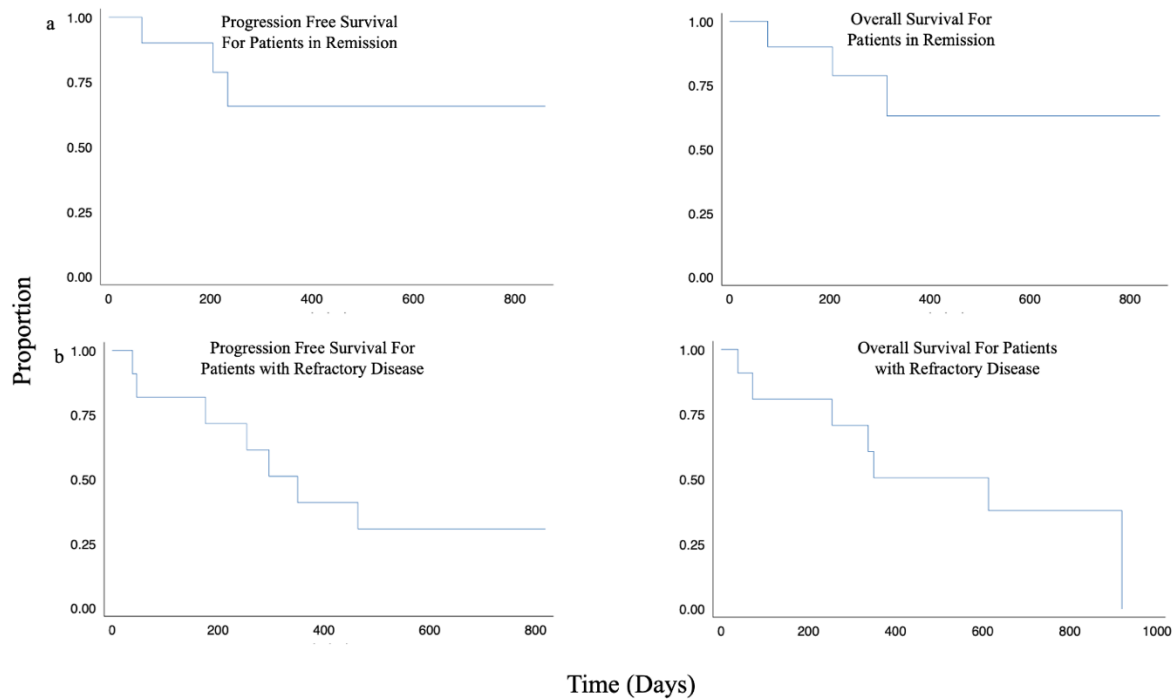

**Supplemental Figure 1. Progression-free survival and overall survival for patients in remission patients with refractory disease.** Estimated 2-year progression-free survival (PFS) and overall survival (OS) was 66% and 63%, respectively, for patients in remission (a). Estimated 2-year PFS and OS were 31% and 38%, respectively, for patients with refractory disease (b).
